# Supplementary material for: Carbonic Anhydrase I as a New Plasma Biomarker for Prostate Cancer
Source: PubMed Central journal article supplement (PMC3506895; doi:10.5402/2012/768190), 2012-11-19
Supplement: 768190.f1.pdf [file 768190.f1.pdf]

# Flow chart of 2DICAL analysis

Fig. S1

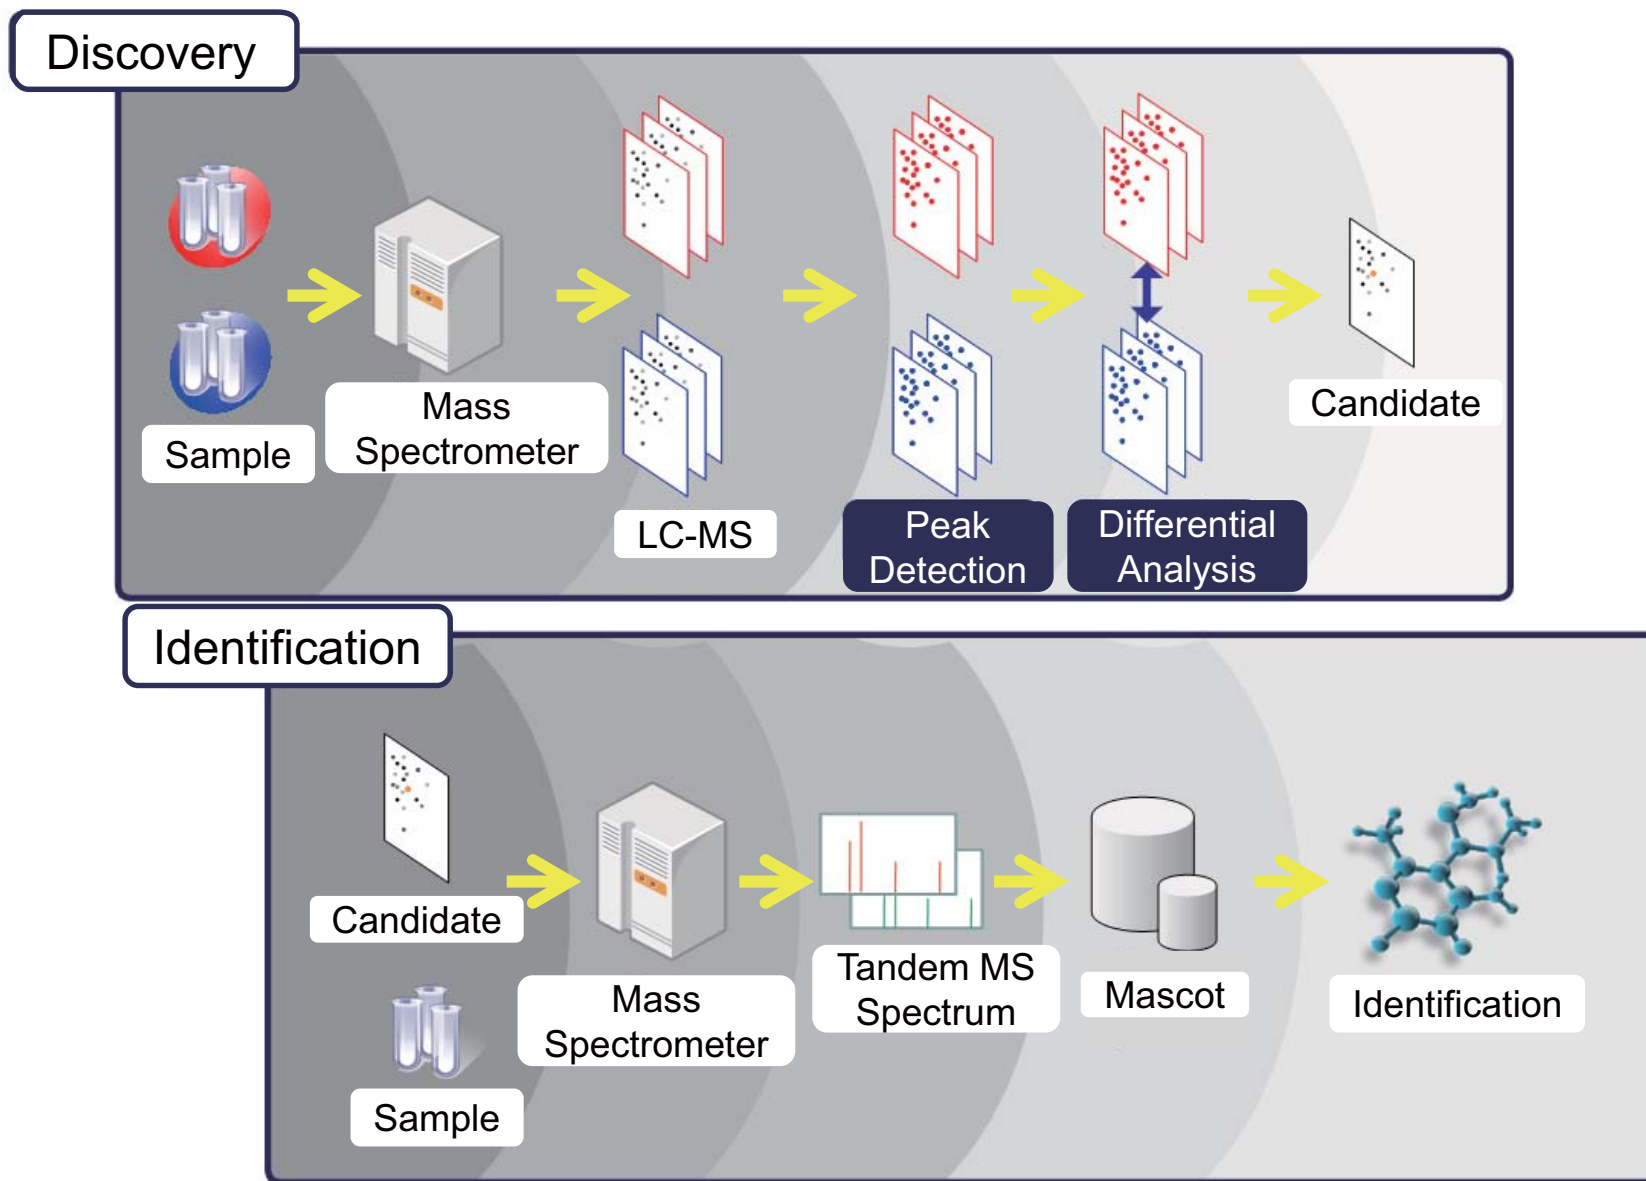

In the first step, 2DICAL discovers candidate peaks via the differential analysis of LC-MS peaks. The candidate peaks are identified by targeted tandem MS in the second step.
